# Supplementary material for: Evaluating Nitrogen Oxide and α-pinene Oxidation Chemistry: Insights from Oxygen and Nitrogen Stable Isotopes
Source: Copernicus journal article supplement (doi:10.5194/egusphere-2024-3860), 2024-12-17
Supplement: Supplementary file 1 [file egusphere-2024-3860-supplement.pdf]

## Contents:

|                                                                          |       |
|--------------------------------------------------------------------------|-------|
| <b>Fig. S1.</b> Measured HNO <sub>3</sub> concentrations .....           | S1    |
| <b>Fig. S2.</b> Measured pNH <sub>4</sub> /pSO <sub>4</sub> Ratios ..... | S2    |
| <b>Fig. S3.</b> Model Organic Nitrate Speciation.....                    | S3    |
| <b>Table S1.</b> USC-API Species List .....                              | S4-S5 |
| <b>Table S2.</b> USC-API Mechanism.....                                  | S6-S9 |
| <b>Table S3.</b> Organic Nitrate Hydrolysis Reactions.....               | S10   |
| <b>Table S4.</b> NO <sub>y</sub> Isotope Data Summary .....              | S11   |

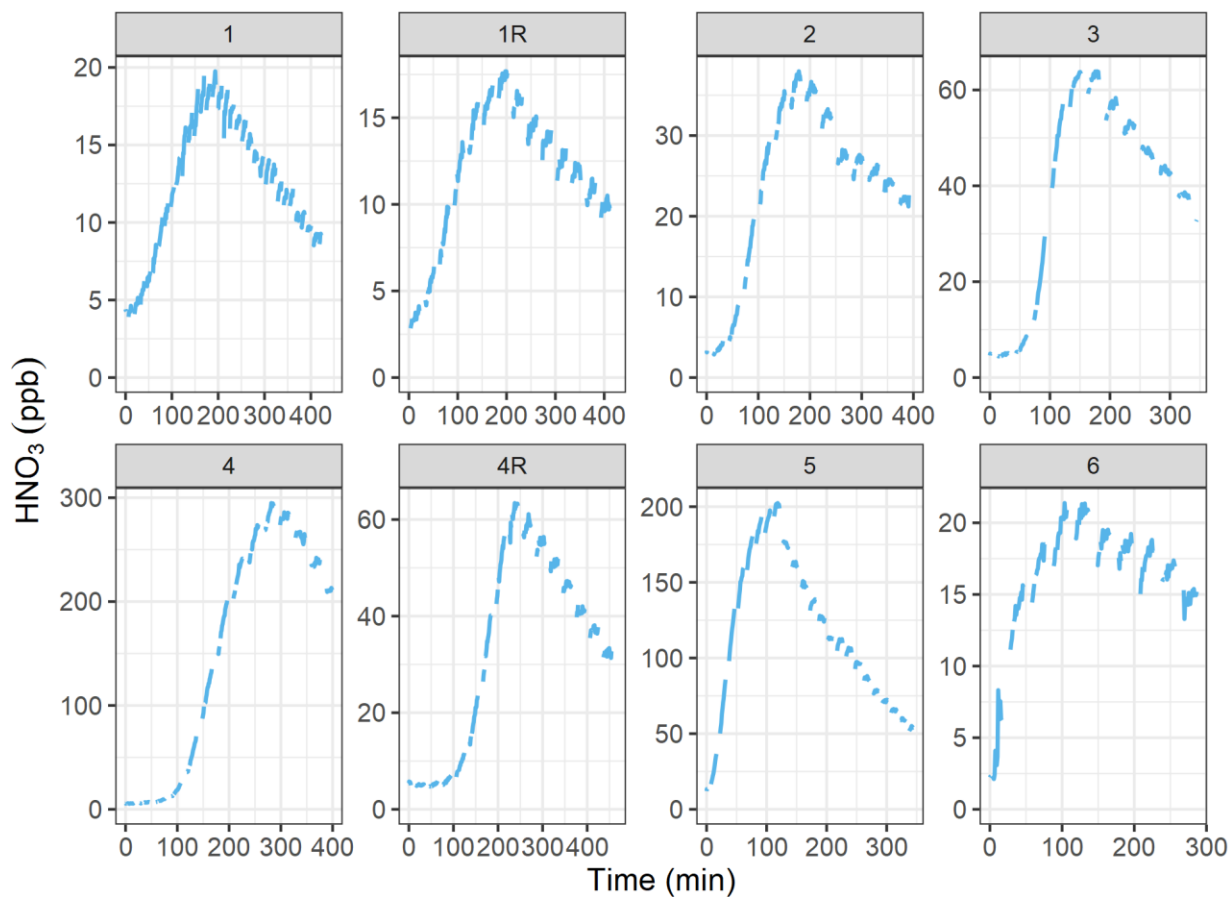

**Fig. S1.** The measured HNO<sub>3</sub> concentrations for the various conducted experiments. The measurements were made using CIMS. A substantial “chamber blank” was observed before the start (time = 0) of the experiments.

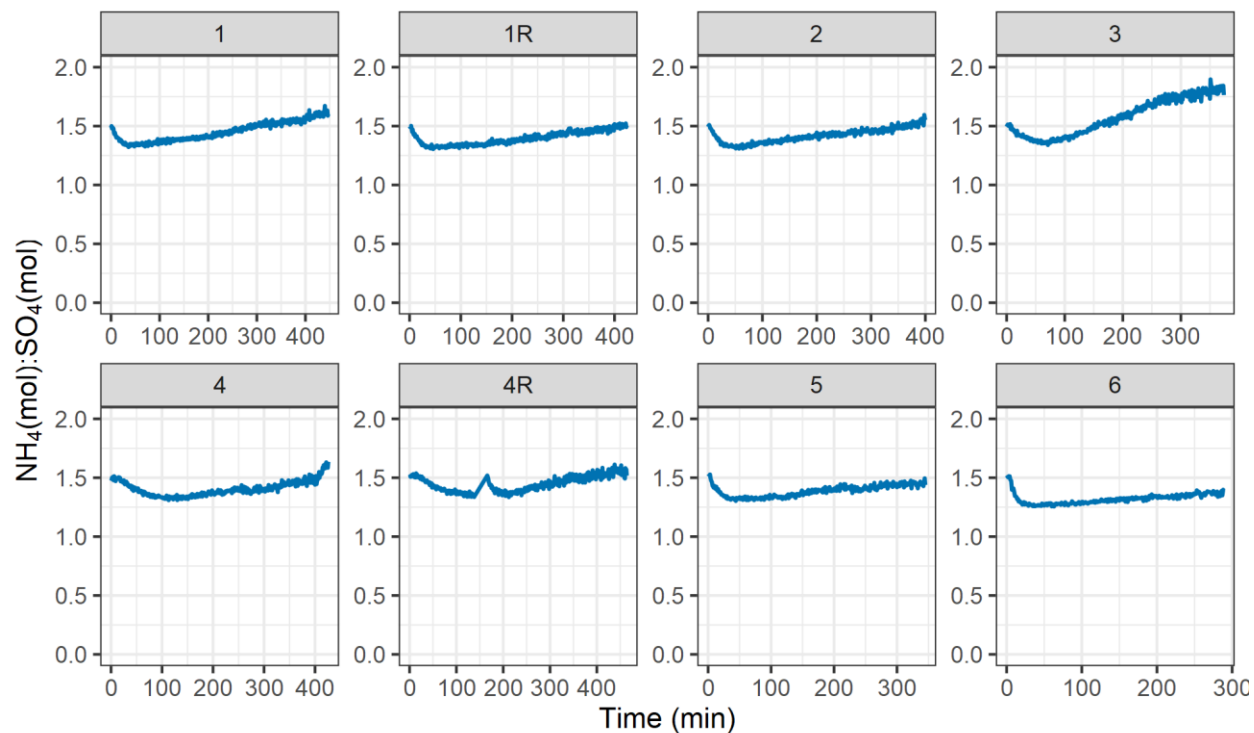

**Fig. S2.** The measured  $\text{NH}_4(\text{mol}):\text{SO}_4(\text{mol})$  ratio for each conducted experiment from the HR-ToF-AMS. The ratios remained consistent and below 2 during the experiment indicative of minor contributions of  $\text{pNO}_3$  derived from  $\text{HNO}_3$ .

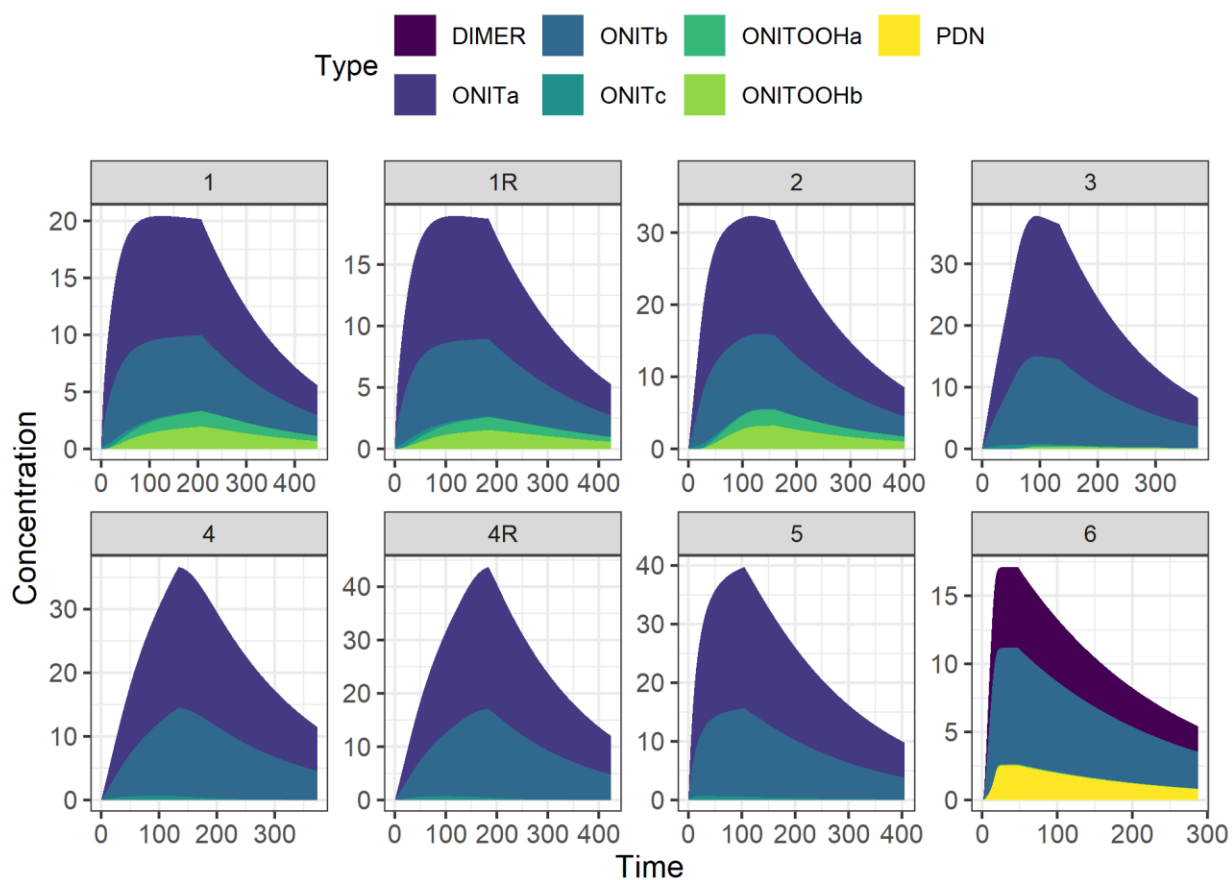

**Fig. S3.** The simulated types of organic nitrate and isomers formed during the various  $\alpha$ -pinene/ $\text{NO}_x$  oxidation experiments using the USC-API mechanism. The mechanism includes 2 pinene hydroxyl-nitrate (ONITa (tertiary) and ONITb (secondary)), pinene carbonyl nitrate (ONITc), pinene nitrooxy-hydroperoxide (ONITOOHa (tertiary) and ONITOOHb (secondary)), dimer (DIMER), and pinene dinitrate (PDN).

**Table S1.** Summary of the USC-API Species List.

| Species          | Description                                          | SMILES                     |
|------------------|------------------------------------------------------|----------------------------|
| <b>Inorganic</b> |                                                      |                            |
| CO               | Carbon monoxide                                      | C=O                        |
| CO2              | Carbon dioxide                                       | O=C=O                      |
| H2               | Hydrogen                                             | [H][H]                     |
| H2O2             | Hydrogen peroxide                                    | OO                         |
| HNO3             | Nitric acid                                          | O=N(=O)O                   |
| HO2              | Hydroperoxy radical                                  | [O]O                       |
| HO2NO2           | Pernitric acid                                       | OO[N+](=O)[O-]             |
| HONO             | Nitrous acid                                         | O=N[O]                     |
| N2O5             | Dinitrogen pentoxide                                 | O=[N+](=O)O[N+](=O)[O-]    |
| NO               | Nitric oxide                                         | [N]=O                      |
| NO2              | Nitrogen dioxide                                     | [O-][N+](=O)               |
| NO3              | Nitrate radical                                      | [O-][N+](=O)O              |
| O1D              | Excited state oxygen atom O( <sup>1</sup> D)         | [O]                        |
| O3               | Ozone                                                | O=O=O                      |
| O3P              | Ground state oxygen atom O( <sub>3</sub> P)          | [O]                        |
| OH               | Hydroxyl radical                                     | [OH]                       |
| <b>Organic</b>   |                                                      |                            |
| ACT              | Acetone                                              | CC(=O)C                    |
| API              | A-pinene                                             | C/C1=C/CC2CC1C2(C)C        |
| APINAO           | alpha-pinene alkoxy radical                          | OC1CC2CC(C1(C)[O])C2(C)C   |
| APINAO2          | tertiary (major) peroxy radical from APIN + OH + O2  | [O]OC1(C)C(O)CC2CC1C2(C)C  |
| APINAOOH         | pinene-derived hydroxy hydroperoxide                 | OOC1(C)C(O)CC2CC1C2(C)C    |
| APINBO           | alpha-pinene alkoxy radical                          | [O]C1CC2CC(C1(C)O)C2(C)C   |
| APINBO2          | secondary (minor) peroxy radical from APIN + OH + O2 | [O]OC1CC2CC(C1(C)O)C2(C)C  |
| APINBOOH         | pinene-derived hydroxy hydroperoxide                 | OOC1CC2CC(C1(C)O)C2(C)C    |
| APINCO           | alpha-pinene alkoxy radical                          | CC1=CCC(CC1O)C(C)(C)[O]    |
| APINCO2          | tertiary (minor) peroxy radical from APIN + OH + O2  | [O]OC(C)(C)C1CC=C(C)C(O)C1 |
| APINCOOH         | pinene-derived hydroxy hydroperoxide                 | OOC(C)(C)C1CC=C(C)C(O)C1   |

|          |                                                                                 |                                                               |
|----------|---------------------------------------------------------------------------------|---------------------------------------------------------------|
| DIMER    | Dimers from nRO <sub>2</sub> + RO <sub>2</sub> reactions                        | CC3(C)C4CC(O[N+](=O)O)C(OOC1(C)C(O[N+](=O)O)CC2CC1C2(C)C)C3C4 |
| MO2      | Generic RO <sub>2</sub>                                                         | N/A                                                           |
| NAPINAO2 | tertiary (major) peroxy radical from APIN + NO <sub>3</sub> + O <sub>2</sub> ;  | [O]OC1CC2CC(C1(C)ON(=O)=O)C2(C)C                              |
| NAPINBO2 | secondary (minor) peroxy radical from APIN + NO <sub>3</sub> + O <sub>2</sub> ; | [O]OC1(C)C(ON(=O)=O)CC2CC1C2(C)C                              |
| ONITa    | Tertiary (major) alpha-pinene hydroxynitrate                                    | O=N(=O)OC1(C)C(O)CC2CC1C2(C)C                                 |
| ONITb    | Secondary (minor) alpha-pinene hydroxynitrate                                   | O=N(=O)OC1CC2CC(C1(C)O)C2(C)C                                 |
| ONITc    | Tertiary alpha-pinene carbonyl nitrate                                          | O=N(=O)OC(C)(C)C1CC=C(C)C(O)C1                                |
| ONITOOHa | Tertiary alpha-pinene nitrate hydroperoxide                                     | OOC1CC2CC(C1(C)ON(=O)=O)C2(C)C                                |
| ONITOOHb | Secondary alpha-pinene nitrate hydroperoxide                                    | OOC1(C)C(ON(=O)=O)CC2CC1C2(C)C                                |
| P        | Generic Product                                                                 | N/A                                                           |
| PAN      | Peroxyacetyl nitrate                                                            | CC(=O)OON(=O)=O                                               |
| PDN      | Pinene dinitrate                                                                | CC1(C)C2CC(O[N+](=O)O)C(C)(O[N+](=O)O)C1C2                    |
| PINAL    | pinonaldehyde                                                                   | CC(=O)C1CC(CC=O)C1(C)C                                        |
| PINO3    | pinonaldehyde-derived acyl peroxy radical                                       | [O]OC(=O)CC1CC(C(=O)C)C1(C)C                                  |
| PINPAN   | C10 peroxyacyl nitrate                                                          | O=N(=O)OOC(=O)CC1CC(C(=O)C)C1(C)C                             |
| RO       | Generic Aloyx Radical                                                           | N/A                                                           |
| RO3      | Generic acyl peroxy radical                                                     | N/A                                                           |

**Table S2.** Summary of the USC-API Mechanism.

| Label                       | Reaction                                                       | Reaction Rate ( <i>k</i> )                                           |
|-----------------------------|----------------------------------------------------------------|----------------------------------------------------------------------|
| <b>Inorganic Photolysis</b> |                                                                |                                                                      |
| R001                        | $O_3 \rightarrow O_3P + O_2$                                   | JO3P*                                                                |
| R002                        | $O_3 \rightarrow O1D + O_2$                                    | JO1D*                                                                |
| R003                        | $H_2O_2 \rightarrow OH + OH$                                   | JH2O2*                                                               |
| R004                        | $NO_2 \rightarrow O_3P + NO$                                   | JNO2*                                                                |
| R005                        | $NO_3 \rightarrow O_2 + NO$                                    | JNO3 NO*                                                             |
| R006                        | $NO_3 \rightarrow O_3P + NO_2$                                 | JNO3 NO2*                                                            |
| R007                        | $HONO \rightarrow OH + NO$                                     | JHONO*                                                               |
| R008                        | $HNO_3 \rightarrow OH + NO_2$                                  | JHNO3*                                                               |
| R009                        | $HO_2NO_2 \rightarrow 0.2 OH + 0.2 NO_3 + 0.8 HO_2 + 0.8 NO_2$ | JHO2NO2*                                                             |
| <b>Inorganic Reactions</b>  |                                                                |                                                                      |
| R010                        | $O_3 + OH \rightarrow HO_2 + O_2$                              | $1.70E-12 * \exp(-940 / T)$                                          |
| R011                        | $O_3 + HO_2 \rightarrow OH + O_2 + O_2$                        | $1.00E-14 * \exp(-490 / T)$                                          |
| R012                        | $O_3 + NO \rightarrow NO_2 + O_2$                              | $1.40E-12 * \exp(-1310 / T)$                                         |
| R013                        | $NO_2 + O_3 \rightarrow NO_3 + O_2$                            | $1.40E-13 * \exp(-2470 / T)$                                         |
| R014                        | $O_3P + O_2 \rightarrow O_3$                                   | $M * 5.60E-34 * (T / 300)^{-2.6} * 0.21 * M$                         |
| R015                        | $O_3P + O_3 \rightarrow O_2 + O_2$                             | $8.00E-12 * \exp(-2060 / T)$                                         |
| R016                        | $O1D + O_2 \rightarrow O_3P + O_2$                             | $3.20E-11 * 0.21 * M$                                                |
| R017                        | $O1D + N_2 \rightarrow O_3P + N_2$                             | $1.80E-11 * \exp(107 / T) * 0.78 * M$                                |
| R018                        | $O1D + H_2O \rightarrow OH + OH$                               | $2.20E-10 * H_2O$                                                    |
| R019                        | $OH + H_2 \rightarrow HO_2 + H_2O$                             | $7.70E-12 * \exp(-2100 / T)$                                         |
| R020                        | $OH + HO_2 \rightarrow H_2O + O_2$                             | $4.80E-11 * \exp(250 / T)$                                           |
| R021                        | $HO_2 + HO_2 \rightarrow H_2O_2 + O_2$                         | $2.20E-13 * \exp(600 / T) + 1.90E-33 * M * \exp(980 / T)$            |
| R022                        | $HO_2 + HO_2 + H_2O \rightarrow H_2O_2 + H_2O + O_2$           | $(3.08E-34 * \exp(2800 / T) + 2.59E-54 * M * \exp(3180 / T)) * H_2O$ |
| R023                        | $H_2O_2 + OH \rightarrow HO_2 + H_2O$                          | $2.90E-12 * \exp(-160 / T)$                                          |
| R024                        | $NO + O_3P \rightarrow NO_2$                                   | K_O3P_NO**                                                           |
| R025                        | $NO + OH \rightarrow HONO$                                     | K_OH_NO**                                                            |
| R026                        | $HO_2 + NO \rightarrow OH + NO_2$                              | $3.45E-12 * \exp(270 / T)$                                           |
| R027                        | $HO_2 + NO \rightarrow HNO_3$                                  | K_HO2_NO_HNO3**                                                      |

|                      |                                                                                                                       |                                                            |
|----------------------|-----------------------------------------------------------------------------------------------------------------------|------------------------------------------------------------|
| R028                 | $\text{NO} + \text{NO} \rightarrow \text{NO}_2 + \text{NO}_2$                                                         | $3.30\text{E-}39 * \exp(530 / \text{T}) * 0.21 * \text{M}$ |
| R029                 | $\text{HONO} + \text{OH} \rightarrow \text{NO}_2 + \text{H}_2\text{O}$                                                | $2.50\text{E-}12 * \exp(260 / \text{T})$                   |
| R030                 | $\text{O}_3\text{P} + \text{NO}_2 \rightarrow \text{NO} + \text{O}_2$                                                 | $5.50\text{E-}12 * \exp(188 / \text{T})$                   |
| R031                 | $\text{O}_3\text{P} + \text{NO}_2 \rightarrow \text{NO}_3$                                                            | $\text{K\_O}_3\text{P\_NO}_2^{**}$                         |
| R032                 | $\text{OH} + \text{NO}_2 \rightarrow \text{HNO}_3$                                                                    | $\text{K\_OH\_NO}_2\text{HONO}_2^{**}$                     |
| R033                 | $\text{OH} + \text{HNO}_3 \rightarrow \text{NO}_3 + \text{H}_2\text{O}$                                               | $\text{K\_OH\_HNO}_3^{**}$                                 |
| R034                 | $\text{OH} + \text{NO}_3 \rightarrow \text{HO}_2 + \text{NO}_2$                                                       | $2.00\text{E-}11$                                          |
| R035                 | $\text{HO}_2 + \text{NO}_3 \rightarrow 0.7 \text{OH} + 0.7 \text{NO}_2 + 0.3 \text{HNO}_3$                            | $4.00\text{E-}12$                                          |
| R036                 | $\text{NO} + \text{NO}_3 \rightarrow \text{NO}_2 + \text{NO}_2$                                                       | $1.80\text{E-}11 * \exp(110 / \text{T})$                   |
| R037                 | $\text{NO}_2 + \text{NO}_3 \rightarrow \text{NO} + \text{NO}_2 + \text{O}_2$                                          | $4.50\text{E-}14 * \exp(-1260 / \text{T})$                 |
| R038                 | $\text{NO}_3 + \text{NO}_3 \rightarrow \text{NO}_2 + \text{NO}_2 + \text{O}_2$                                        | $8.50\text{E-}13 * \exp(-2450 / \text{T})$                 |
| R039                 | $\text{NO}_2 + \text{NO}_3 \rightarrow \text{N}_2\text{O}_5$                                                          | $\text{K\_NO}_2\text{NO}_3^{**}$                           |
| R040                 | $\text{N}_2\text{O}_5 \rightarrow \text{NO}_2 + \text{NO}_3$                                                          | $\text{K\_N}_2\text{O}_5^{**}$                             |
| R041                 | $\text{N}_2\text{O}_5 + \text{H}_2\text{O} \rightarrow \text{HNO}_3 + \text{HNO}_3$                                   | $2.50\text{E-}22 * \text{H}_2\text{O}$                     |
| R042                 | $\text{HO}_2 + \text{NO}_2 \rightarrow \text{HO}_2\text{NO}_2$                                                        | $\text{K\_HO}_2\text{NO}_2^{**}$                           |
| R043                 | $\text{HO}_2\text{NO}_2 \rightarrow \text{HO}_2 + \text{NO}_2$                                                        | $\text{K\_HO}_2\text{NO}_2^{**}$                           |
| R044                 | $\text{OH} + \text{HO}_2\text{NO}_2 \rightarrow \text{NO}_2 + \text{H}_2\text{O} + \text{O}_2$                        | $1.30\text{E-}12 * \exp(380 / \text{T})$                   |
| R045                 | $\text{OH} + \text{CO} \rightarrow \text{HO}_2 + \text{CO}_2$                                                         | $\text{K\_OH\_CO}^{**}$                                    |
| <b>API Oxidation</b> |                                                                                                                       |                                                            |
| R046                 | $\text{API} + \text{OH} \rightarrow 0.572 \text{APINAO}_2 + 0.353 \text{APINBO}_2 + 0.075 \text{APINCO}_2$            | $1.2\text{e-}11 * \exp(440 / \text{T})$                    |
| R047                 | $\text{API} + \text{O}_3 \rightarrow \text{RO}_2 + \text{OH}$                                                         | $8.05\text{e-}16 * \exp(-640 / \text{T})$                  |
| R048                 | $\text{API} + \text{NO}_3 \rightarrow 0.65 \text{NAPINAO}_2 + 0.35 \text{NAPINBO}_2$                                  | $1.2\text{e-}12 * \exp(490 / \text{T})$                    |
| <b>APIO2 Rxns</b>    |                                                                                                                       |                                                            |
| R049                 | $\text{APINAO}_2 + \text{NO} \rightarrow 0.23 \text{ONITa} + 0.77 \text{PINAL} + 0.77 \text{HO}_2 + 0.77 \text{NO}_2$ | $2.70\text{e-}12 * \exp(360 / \text{T})$                   |
| R050                 | $\text{APINBO}_2 + \text{NO} \rightarrow 0.23 \text{ONITb} + 0.77 \text{PINAL} + 0.77 \text{HO}_2 + 0.77 \text{NO}_2$ | $2.70\text{e-}12 * \exp(360 / \text{T})$                   |
| R051                 | $\text{APINCO}_2 + \text{NO} \rightarrow 0.125 \text{ONITc} + 0.875 \text{ACT} + 0.875 \text{P} + 0.875 \text{NO}_2$  | $2.70\text{e-}12 * \exp(360 / \text{T})$                   |
| R052                 | $\text{APINAO}_2 + \text{HO}_2 \rightarrow \text{APINAOOH}$                                                           | $2.91\text{e-}13 * \exp(1300 / \text{T}) * 0.914$          |
| R053                 | $\text{APINBO}_2 + \text{HO}_2 \rightarrow \text{APINBOOH}$                                                           | $2.91\text{e-}13 * \exp(1300 / \text{T}) * 0.914$          |
| R054                 | $\text{APINCO}_2 + \text{HO}_2 \rightarrow \text{APINCOOH}$                                                           | $2.91\text{e-}13 * \exp(1300 / \text{T}) * 0.914$          |
| R055                 | $\text{APINAO}_2 + \text{NO}_3 \rightarrow \text{APINAO} + \text{NO}_2$                                               | $\text{KRO}_2\text{NO}_3^{**}$                             |
| R056                 | $\text{APINBO}_2 + \text{NO}_3 \rightarrow \text{APINBO} + \text{NO}_2$                                               | $\text{KRO}_2\text{NO}_3^{**}$                             |
| R057                 | $\text{APINCO}_2 + \text{NO}_3 \rightarrow \text{APINCO} + \text{NO}_2$                                               | $\text{KRO}_2\text{NO}_3^{**}$                             |



| <b>PINAL Chemistry</b>   |                                                               |                                    |
|--------------------------|---------------------------------------------------------------|------------------------------------|
| R058                     | PINAL + hv → RO2 + CO + HO2                                   | J.JPINAL*                          |
| R059                     | PINAL + OH → PINO3 + RO2                                      | 5.2e-12 * exp(600 / T)             |
| R060                     | PINAL + NO3 → PINO3 + HNO3                                    | 2.00E-14                           |
| R061                     | PINO3 + NO → RO2 + NO2                                        | 7.5E-12 * exp(290 / T)             |
| R062                     | PINO3 + NO3 → RO2 + NO2                                       | 4.00E-12                           |
| R063                     | PINO3 + NO2 → PINPAN                                          | K_ACO3_NO2**                       |
| R064                     | PINO3 + HO2 → 0.44 RO2 + 0.44 OH + 0.15 O3 + 0.55 P           | 5.20E-13 * exp(980 / T)            |
| R065                     | PINPAN → PINO3 + NO2                                          | K_PAN**                            |
| <b>General RO2 Rxns</b>  |                                                               |                                    |
| R066                     | MO2 + NO → NO2 + RO                                           | 2.7e-12 * exp(360 / T)             |
| R067                     | MO2 + HO2 → P                                                 | 2.91e-13 * exp(1300 / T)           |
| R068                     | MO2 + NO3 → RO + NO2                                          | 2.30E-12                           |
| R069                     | MO2 + MO2 → P                                                 | 1.30E-12                           |
| R070                     | MO2 + PINO3 → P                                               | 5.00E-12                           |
| <b>ACT Chemistry</b>     |                                                               |                                    |
| R071                     | ACT + OH → RO2                                                | 1.39E-13 + 3.72E-11 exp(-2044 / T) |
| R072                     | ACT + hv → RO3 + RO2                                          | JACT*                              |
| <b>PAN Chemistry</b>     |                                                               |                                    |
| R073                     | RO3 + NO2 → PAN                                               | K_ACO3_NO2**                       |
| R074                     | PAN → RO3 + NO2                                               | K_PAN**                            |
| R075                     | PAN + hv → RO3 + NO2                                          | JPAN1*                             |
| R076                     | PAN + hv → MO2 + NO3 + CO2                                    | JPAN2*                             |
| <b>RO3 Chemistry</b>     |                                                               |                                    |
| R077                     | RO3 + NO → RO2 + NO2                                          | 8.10E-12 * exp(270 / T)            |
| R078                     | RO3 + HO2 → P                                                 | 4.30E-13 * exp(1040 / T)           |
| R079                     | RO3 + RO2 → HO2 + P                                           | 2.00E-12 * exp(500 / T)            |
| R080                     | RO3 + RO3 → P                                                 | 2.50E-12 * exp(500 / T)            |
| <b>APIOOH Chemistry</b>  |                                                               |                                    |
| R081                     | APINAOOH + hv → P + OH                                        | J.JAPINAOOH*                       |
| R082                     | APINAOOH + OH → RO2                                           | 1.83E-11                           |
| R083                     | APINBOOH + hv → P + OH                                        | J.JAPINAOOH*                       |
| R084                     | APINBOOH + OH → P + OH                                        | 3.28E-11                           |
| R085                     | APINCOOH + hv → P + OH                                        | J.JAPINAOOH*                       |
| R086                     | APINCOOH + OH → RO2                                           | 1.03E-10                           |
| <b>NAPINO2 Chemistry</b> |                                                               |                                    |
| R087                     | NAPINAO2 + HO2 → 0.37 ONITa + 0.63 PINAL + 0.63 HO2 + 0.63 OH | 2.66e-13 * exp(1300 / T)           |

|                            |                                                                                                                                                         |                                           |
|----------------------------|---------------------------------------------------------------------------------------------------------------------------------------------------------|-------------------------------------------|
| R088                       | $\text{NAPINAO}_2 + \text{NO} \rightarrow 0.9 \text{ PINAL} + 1.9 \text{ NO}_2 + 0.1 \text{ ONITa}$                                                     | $2.55\text{e-}12 * \exp(380 / \text{T})$  |
| R089                       | $\text{NAPINAO}_2 + \text{NO}_3 \rightarrow 0.1 \text{ PDN} + 0.9 \text{ PINAL} + 1.8 \text{ NO}_2$                                                     | 2.30E-12                                  |
| R090                       | $\text{NAPINAO}_2 + \text{NAPINAO}_2 \rightarrow 0.16 \text{ DIMER} + 1.68 \text{ PINAL} + 1.68 \text{ NO}_2$                                           | 1.00E-14                                  |
| R091                       | $\text{NAPINAO}_2 + \text{NAPINBO}_2 \rightarrow 0.34 \text{ ONITb} + 0.08 \text{ DIMER} + 1.34 \text{ PINAL} + 0.08 \text{ DIMER} + 1.34 \text{ NO}_2$ | 1.00E-14                                  |
| R092                       | $\text{NAPINBO}_2 + \text{HO}_2 \rightarrow \text{ONITOOHb}$                                                                                            | $2.66\text{e-}13 * \exp(1300 / \text{T})$ |
| R093                       | $\text{NAPINBO}_2 + \text{NO} \rightarrow 0.9 \text{ PINAL} + 1.9 \text{ NO}_2 + 0.1 \text{ ONITb}$                                                     | $2.55\text{e-}12 * \exp(380 / \text{T})$  |
| R094                       | $\text{NAPINBO}_2 + \text{NO}_3 \rightarrow 0.1 \text{ PDN} + 0.9 \text{ PINAL} + 1.8 \text{ NO}_2$                                                     | 2.30E-12                                  |
| R095                       | $\text{NAPINBO}_2 + \text{NAPINBO}_2 \rightarrow 0.68 \text{ ONITb} + 0.16 \text{ DIMER} + \text{PINAL} + \text{NO}_2$                                  | 1.00E-14                                  |
| <b>RO2 Cross Reactions</b> |                                                                                                                                                         |                                           |
| R096                       | $\text{APINAO}_2 + \text{APINAO}_2 \rightarrow 2 \text{ PINAL} + 2 \text{ HO}_2$                                                                        | 1.00E-14                                  |
| R097                       | $\text{APINAO}_2 + \text{APINBO}_2 \rightarrow 2 \text{ PINAL} + 2 \text{ HO}_2$                                                                        | 1.00E-14                                  |
| R098                       | $\text{APINAO}_2 + \text{APINCO}_2 \rightarrow 2 \text{ PINAL} + 2 \text{ HO}_2$                                                                        | 1.00E-14                                  |
| R099                       | $\text{APINBO}_2 + \text{APINBO}_2 \rightarrow 2 \text{ PINAL} + 2 \text{ HO}_2$                                                                        | 1.00E-14                                  |
| R0100                      | $\text{APINBO}_2 + \text{APINCO}_2 \rightarrow 2 \text{ PINAL} + 2 \text{ HO}_2$                                                                        | 1.00E-14                                  |
| R101                       | $\text{APINCO}_2 + \text{APINCO}_2 \rightarrow 2 \text{ PINAL} + 2 \text{ HO}_2$                                                                        | 1.00E-14                                  |
| R102                       | $\text{RO} + \text{O}_2 \rightarrow \text{MO}_2$                                                                                                        | $1\text{E-}11 * \text{M} * 0.21$          |
| <b>ONIT Reactions</b>      |                                                                                                                                                         |                                           |
| R103                       | $\text{ONITa} + \text{OH} \rightarrow \text{PINAL} + \text{NO}_2$                                                                                       | 5.50E-12                                  |
| R104                       | $\text{ONITb} + \text{OH} \rightarrow \text{P} + \text{NO}_2$                                                                                           | 3.64E-12                                  |
| R105                       | $\text{ONITc} + \text{OH} \rightarrow \text{ACT} + \text{P} + \text{NO}_2$                                                                              | 9.87E-11                                  |
| R106                       | $\text{ONITc} + \text{h}\nu \rightarrow \text{ACT} + \text{RO}_2 + \text{NO}_2$                                                                         | JONIT*                                    |

\*The photolysis frequencies (J) were calculated inline using the F0AM Box model based on the MCMv3.2 cross-sections

\*\*The complex reaction rate constants (K) were from the MCMv3.2

**Table S3.** Summary of the organic nitrate hydrolysis reactions incorporated into the USC-API (“USC-API-Hydro”) mechanism that was utilized for a sensitivity simulation. Note: the DIMER and pinene dinitrate were not included in the hydrolysis scheme since the nighttime oxidation experiment exhibited low organic nitrate filter hydrolysis efficiency.

| <b>Label</b> | <b>Reaction</b> | <b>Rate (<i>k</i>)</b> |
|--------------|-----------------|------------------------|
| Hydro-01     | ONITa=HNO3+P    | 2.78E-04               |
| Hydro-02     | ONITb=HNO3+P    | 2.78E-04               |
| Hydro-03     | ONITc=HNO3+P    | 2.78E-04               |
| Hydro-04     | ONITOOHa=HNO3+P | 2.78E-04               |
| Hydro-05     | ONITOOHb=HNO3+P | 2.78E-04               |

**Table S4.** Summary of the measured NO<sub>y</sub> isotope data ( $\Delta^{17}\text{O}$ ,  $\delta^{18}\text{O}$ , and  $\delta^{15}\text{N}$ ) and uncertainties ( $\pm\sigma$ ) for the various conducted experiments.

| Exp | NO <sub>2</sub> (‰)   |                       |                       | HNO <sub>3</sub> (‰)  |                       |                       | pNO <sub>3</sub> (‰)  |                       |                       |
|-----|-----------------------|-----------------------|-----------------------|-----------------------|-----------------------|-----------------------|-----------------------|-----------------------|-----------------------|
|     | $\delta^{15}\text{N}$ | $\Delta^{17}\text{O}$ | $\delta^{18}\text{O}$ | $\delta^{15}\text{N}$ | $\Delta^{17}\text{O}$ | $\delta^{18}\text{O}$ | $\delta^{15}\text{N}$ | $\Delta^{17}\text{O}$ | $\delta^{18}\text{O}$ |
| 1   | -67.8±1.7             | 13.4±0.7              | 43.6±1.8              | -37.0±1.7             | 15.6±0.7              | 49.0±1.8              | -79.6±2.4             | 5.2±0.8               | 21.7±0.7              |
| 1R  | -63.3±1.7             | 10.8±0.7              | 45.3±1.8              | -37.7±1.7             | 16.6±0.7              | 49.0±1.8              | -76.3±2.6             | 5.6±0.8               | 22.3±0.8              |
| 2   | -68.3±1.7             | 18.9±0.7              | 65.8±1.8              | -34.3±1.7             | 13.4±0.7              | 43.7±1.8              | -78.5±1.1             | 9.2±0.7               | 29.2±0.6              |
| 3   | -70.2±1.7             | 32.4±0.7              | 92.6±1.8              | -32.0±1.7             | 16.5±0.7              | 49.5±1.8              | -73.1±1.8             | 11.1±0.8              | 37.7±0.8              |
|     | -71.8±1.7             | 32.6±0.7              | 86.6±1.8              | -20.1±1.7             | 16.3±0.7              | 48.5±1.8              |                       |                       |                       |
|     | -68.7±1.7             | 31.2±0.7              | 80.6±1.8              | -19.1±1.7             | 16.7±0.7              | 49.3±1.8              |                       |                       |                       |
| 4   | -67.8±1.7             | 40.8±0.7              | 108.7±1.8             | -32.8±1.7             | 18.1±0.7              | 48.1±1.8              | -90.3±1.9             | 12.0±0.7              | 42.4±0.8              |
|     | -71.0±1.7             | 39.3±0.7              | 107.8±1.8             | -47.0±1.7             | 21.1±0.7              | 60.2±1.8              |                       |                       |                       |
|     | -71.4±1.7             | 38.6±0.7              | 112.1±1.8             | -49.7±1.7             | 21.7±0.7              | 61.3±1.8              |                       |                       |                       |
| 4R  | -67.6±1.7             | 39.6±0.7              | 107.8±1.8             | -29.6±1.7             | 17.8±0.7              | 53.9±1.8              | -87.5±4.1             | 11.8±0.9              | 40.4±1.4              |
|     | -62.9±1.7             | 39.4±0.7              | 115.3±1.8             | -30.6±1.7             | 18.1±0.7              | 55.0±1.8              |                       |                       |                       |
|     | -68.2±1.7             | 40.7±0.7              | 108.5±1.8             | -26.8±1.7             | 17.9±0.7              | 52.2±1.8              |                       |                       |                       |
|     | -68.7±1.7             | 41.2±0.7              | 108.7±1.8             | -26.8±1.7             | 18.4±0.7              | 54.7±1.8              |                       |                       |                       |
| 5   | -5.5±1.7              | 39.1±0.7              | 103.0±1.8             | -8.0±1.7              | 14.7±0.7              | 48.5±1.8              | -22.5±1.0             | 15.6±0.9              | 51.0±1.4              |
|     | -6.0±1.7              | 36.9±0.7              | 100.8±1.8             | -6.3±1.7              | 15.7±0.7              | 48.3±1.8              |                       |                       |                       |
|     | -6.0±1.7              | 37.0±0.7              | 98.0±1.8              | -4.0±1.7              | 15.3±0.7              | 48.7±1.8              |                       |                       |                       |
|     | -7.1±1.7              | 38.1±0.7              | 101.0±1.8             | -4.7±1.7              | 15.2±0.7              | 46.8±1.8              |                       |                       |                       |
| 6   | -46.0±1.7             | 7.0±0.7               | 31.2±1.8              | -24.8±1.7             | 14.5±0.7              | 45.4±1.8              | NA                    | NA                    | NA                    |
|     | -45.8±1.7             | 7.3±0.7               | 31.7±1.8              | -21.6±1.7             | 15.3±0.7              | 47.0±1.8              |                       |                       |                       |
|     | -45.5±1.7             | 7.4±0.7               | 32.7±1.8              | -24.4±1.7             | 15.3±0.7              | 45.8±1.8              |                       |                       |                       |
